# Supplementary material
Source: Springer Nature journal article supplement (https://www.springermedizin.de/resource/supplementary/12882_2013_737_MOESM3_ESM.docx/9454598)
Supplement: MOESM3 [file 9454598]

**Figure 3: Adjusted odds ratios of (a) incident and (b) prevalent catheter usage by distance to centre and length of pre-dialysis care.**


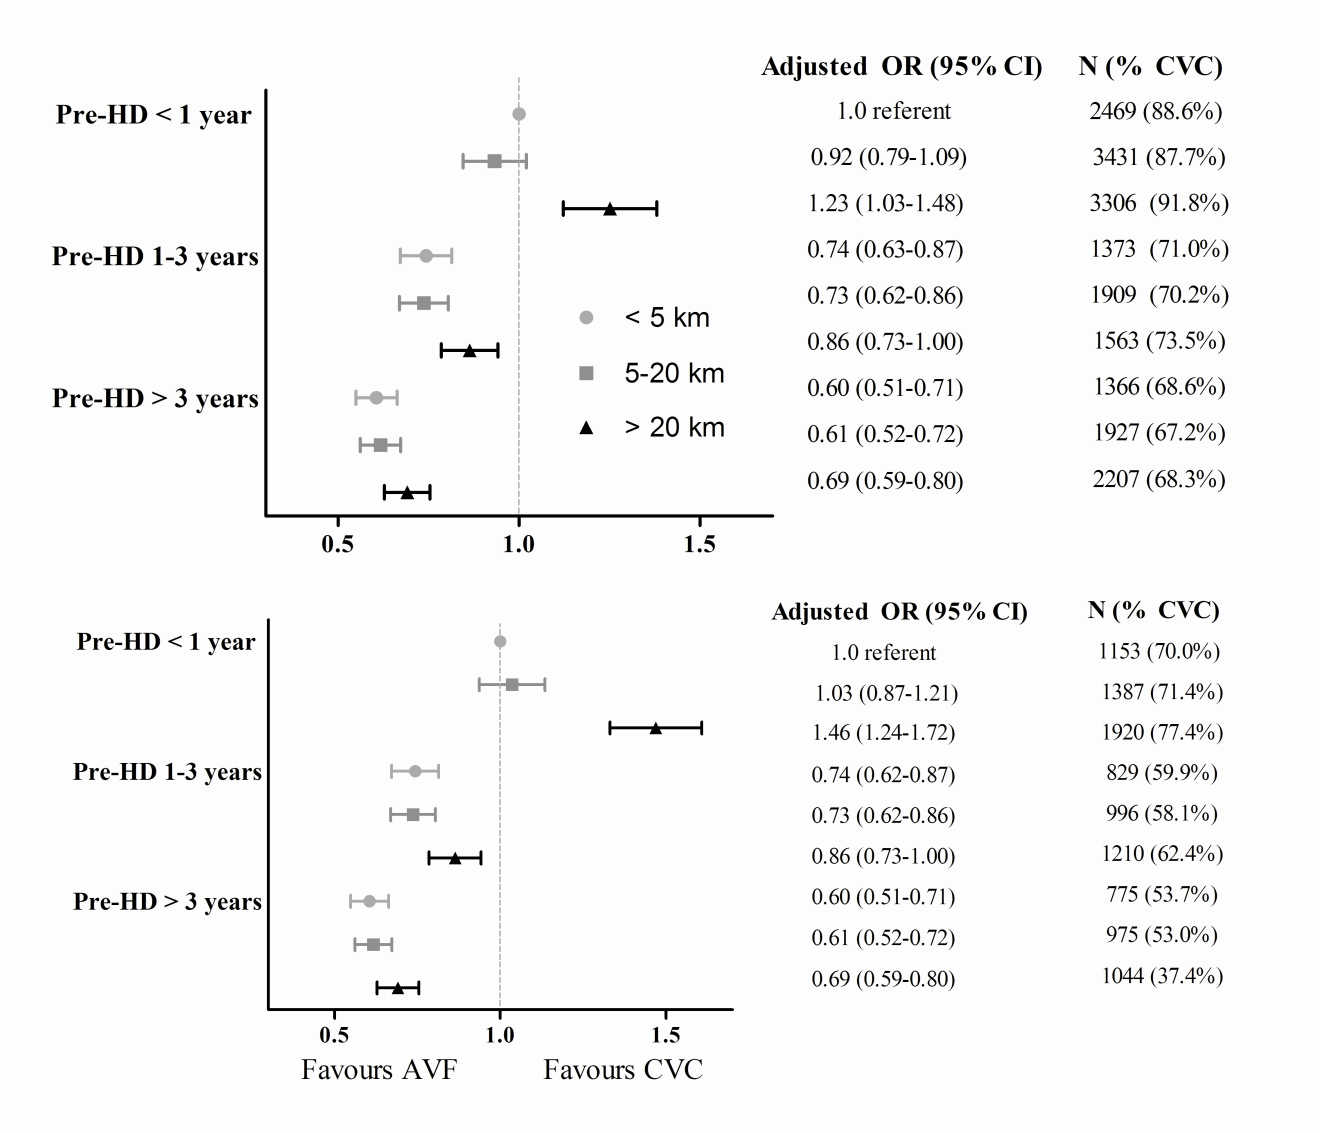


Pre-dialysis care duration X distance interaction p < 0.0001 for incident and prevalent vascular access

Adjusted for race, sex, age, BMI, alb, Hb, co-morbidities, cause of ESRD, region.

N number, Pre-HD pre-dialysis care, OR odds ratio, CVC central venous catheter, km kilometer
